# Supplementary material for: Risk Score for Prediction of Dialysis After Transcatheter Aortic Valve Replacement
Source: PubMed Central journal article supplement — J Am Heart Assoc. 2024 Mar 27;13(7):e032955. doi: 10.1161/JAHA.123.032955 (PMC11179782; doi:10.1161/jaha.123.032955), 2024-03-27
Supplement: JAH3-13-e032955-s001.pdf [file JAH3-13-e032955-s001.pdf]

# **SUPPLEMENTAL MATERIAL**

**Table S1. Main clinical and procedural features in Derivation and Validation Cohorts**

|                             | <b>Derivation Cohort<br/>(n=6714)</b> | <b>Validation<br/>Cohort (n=3357)</b> | <b><i>p</i></b> |
|-----------------------------|---------------------------------------|---------------------------------------|-----------------|
| Age (years)                 | 81.7±6.4                              | 81.7±6.6                              | 0.46            |
| Male Sex (%)                | 48.2                                  | 47.9                                  | 0.72            |
| BMI                         | 26.7±4.9                              | 26.6±4.9                              | 0.76            |
| Diabetes (%)                | 28.7                                  | 28.7                                  | 1               |
| Hypertension (%)            | 83.1                                  | 83.2                                  | 0.94            |
| Smoking (%)                 | 17.5                                  | 18.1                                  | 0.              |
| NYHA III-IV (%)             | 76.5                                  | 76.7                                  | 0.89            |
| Prior PCI (%)               | 24.1                                  | 22.7                                  | 0.13            |
| Prior CABG (%)              | 12.3                                  | 13.1                                  | 0.30            |
| Prior CVA (%)               | 20.1                                  | 20.3                                  | 0.81            |
| PAD (%)                     | 17.4                                  | 18.1                                  |                 |
| Active cancer (%)           | 4.7                                   | 4.1                                   | 0.25            |
| Porcelain aorta (%)         | 4.7                                   | 7.1                                   | 0.34            |
| AF (%)                      | 27.1                                  | 27.6                                  |                 |
| Anemia (%)                  | 30.8                                  | 31.0                                  | 0.82            |
| Creatinine (mg/dL)          | 1.3±1.8                               | 1.3±1.1                               | 0.78            |
| Creatinine clearance mL/min | 53±24                                 | 53±25                                 | 0.64            |
| CKD                         |                                       |                                       | 0.86            |
| • CKD stage 5 (%)           | 6.4                                   | 6.8                                   |                 |
| • CKD stage 4 or 5 (%)      | 6.6                                   | 7.0                                   |                 |
| • CKD stage 3 (%)           | 52.6                                  | 51.9                                  |                 |
| • CKD stage 2 (%)           | 27.4                                  | 27.2                                  |                 |

---

|                                  |           |           |      |
|----------------------------------|-----------|-----------|------|
| • CKD stage 1 (%)                | 7.0       | 7.1       |      |
| Hb (g/dL)                        | 12.2±1.7  | 12.1±1.7  | 0.46 |
| STS score                        | 5.5±4.8   | 5.6±5.2   | 0.43 |
| Euroscore II                     | 5.9±5.6   | 5.9±5.7   | 0.64 |
| EF (%)                           | 54.6±11.5 | 54.4±11.5 | 0.43 |
| Mean Aortic gradient (mmHg)      | 47±15     | 47±16     | 0.80 |
| Contrast Volume (mL)             | 194±91    | 194±92    | 0.92 |
| Valve size (mm)                  | 26.5±2.7  | 26.5±2.7  | 0.46 |
| Femoral access (%)               | 92.2      | 91.4      | 0.16 |
| Apical access (%)                | 5.1       | 5.5       | 0.35 |
| Other access (%)                 | 2.7       | 3.1       | 0.32 |
| Corevalve (%)                    | 42.4      | 44.4      | 0.06 |
| Edwards (%)                      | 38.2      | 36.6      | 0.11 |
| Other valves (%)                 | 19.4      | 19.0      | 0.86 |
| Aspirin (%)                      | 54.7      | 56.2      | 0.21 |
| P2Y12 inhibitor (%)              | 21.3      | 21.4      | 0.97 |
| DAPT (%)                         | 14.8      | 15.8      | 0.28 |
| VKA (%)                          | 21.3      | 20.5      | 0.44 |
| NOAC (%)                         | 11.0      | 11.5      | 0.55 |
| Surgical Vascular Closure (%)    | 9.1       | 9.1       | 0.96 |
| Transfusion (%)                  | 17.1      | 17.0      | 0.98 |
| Major Vascular Complications (%) | 6.8       | 6.3       | 0.29 |
| Minor Vascular Complications (%) | 7.8       | 7.3       | 0.42 |
| Post procedural dialysis (%)     | 0.8       | 0.6       | 0.28 |

---

AF = atrial fibrillation; BMI = body mass index; CABG = coronary artery bypass graft; CKD = chronic kidney disease; CVA = cerebrovascular accident; DAPT = dual antiplatelet therapy; EF = ejection fraction; MI = myocardial infarction; NYHA = New York Heart Association; PAD = peripheral artery disease; PCI = percutaneous coronary intervention; PG = pressure gradient; STS = Society of Thoracic Surgeons; TIA = transient ischemic attack; VKA = vitamin K antagonist.

**Table S2. Factors associated with postprocedural dialysis at univariate analysis in the derivation cohort**

|                    | <b>OR (95% CI)</b>      | <b>P</b>          |
|--------------------|-------------------------|-------------------|
| <b>Sex (male)</b>  | <b>2.23 (1.24-4.00)</b> | <b>0.007</b>      |
| <b>Age (years)</b> | <b>0.96 (0.93-1.00)</b> | <b>0.06</b>       |
| Age >85 years      | 0.57 (0.31-1.06)        | 0.08              |
| BMI                | 1.01 (0.95-1.06)        | 0.94              |
| <b>Diabetes</b>    | <b>1.97 (1.13-3.43)</b> | <b>0.02</b>       |
| Hypertension       | 0.91 (0.40-2.07)        | 0.82              |
| Smoking            | 2.03 (0.49-1.90)        | 0.92              |
| NYHA III-IV        | 1.99 (0.91-4.51)        | 0.08              |
| <b>CAD</b>         | <b>1.84 (1.07-3.17)</b> | <b>0.03</b>       |
| Prior PCI          | 1.21 (0.65-2.25)        | 0.55              |
| <b>Prior CABG</b>  | <b>2.56 (1.35-4.86)</b> | <b>0.004</b>      |
| Prior CVA          | 1.54 (0.88-2.69)        | 0.13              |
| <b>PAD</b>         | <b>2.80 (1.55-5.07)</b> | <b>0.001</b>      |
| Porcelain aorta    | 1.84 (0.56-6.02)        | 0.32              |
| Cancer             | 1.10 (0.49-2.48)        | 0.82              |
| AF                 | 1.17 (0.66-2.09)        | 0.59              |
| <b>Anemia</b>      | <b>3.05 (1.76-5.30)</b> | <b>&lt;0.0001</b> |
| Aspirin            | 1.21 (0.76-1.93)        | 0.74              |
| P2Y12 inhibitor    | 0.93 (0.13-7.21)        | 0.94              |
| DAPT               | 1.39 (0.57-3.39)        | 0.48              |
| VKA                | 1.34 (0.62-2.88)        | 0.45              |
| EF < 40%           | 0.99 (0.42-2.33)        | 0.98              |

|                                     |                           |                   |
|-------------------------------------|---------------------------|-------------------|
| EF < 30%                            | 2.4 (1.03-5.58)           | 0.04              |
| Core Valve                          | 0.88 (0.48-1.62)          | 0.69              |
| Edwards valve                       | 1.18 (0.68-2.07)          | 0.56              |
| Other valves                        | 0.58 (0.21-1.63)          | 0.31              |
| <b>No femoral access</b>            | <b>6.68 (3.76-11.87)</b>  | <b>&lt;0.0001</b> |
| Valve size                          | 0.98 (0.88-1.08)          | 0.66              |
| Valve in valve                      | 1.11 (0.35-3.52)          | 0.87              |
| <b>CKD stage 5</b>                  | <b>2.80 (1.20-6.53)</b>   | <b>0.02</b>       |
| <b>CKD stage 4 or 5</b>             | <b>2.73 (1.49-5.02)</b>   | <b>0.001</b>      |
| CKD stage 3                         | 1.03 (0.59-1.79)          | 0.92              |
| <b>Contrast x100 ml</b>             | <b>1.36 (1.12-1.67)</b>   | <b>0.003</b>      |
| <b>Major vascular complications</b> | <b>4.46 (2.36-8.43)</b>   | <b>&lt;0.0001</b> |
| <b>Transfusion</b>                  | <b>10.01 (5.55-18.07)</b> | <b>&lt;0.0001</b> |
| Valve migration                     | 2.96 (0.93-9.96)          | 0.09              |
| Paravalvular leak                   | 1.06 (0.65-1.75)          | 0.81              |

BMI = body mass index; CABG = coronary artery bypass graft; CAD= coronary artery disease; CKD = chronic kidney disease; CVA = cerebrovascular accident; DAPT = dual antiplatelet therapy; EF = ejection fraction; NYHA = New York Heart Association; PAD = peripheral artery disease; PCI = percutaneous coronary intervention; VKA = vitamin K antagonist.

**Figure S1. Scaled Schoenfeld Residuals vs. Time**

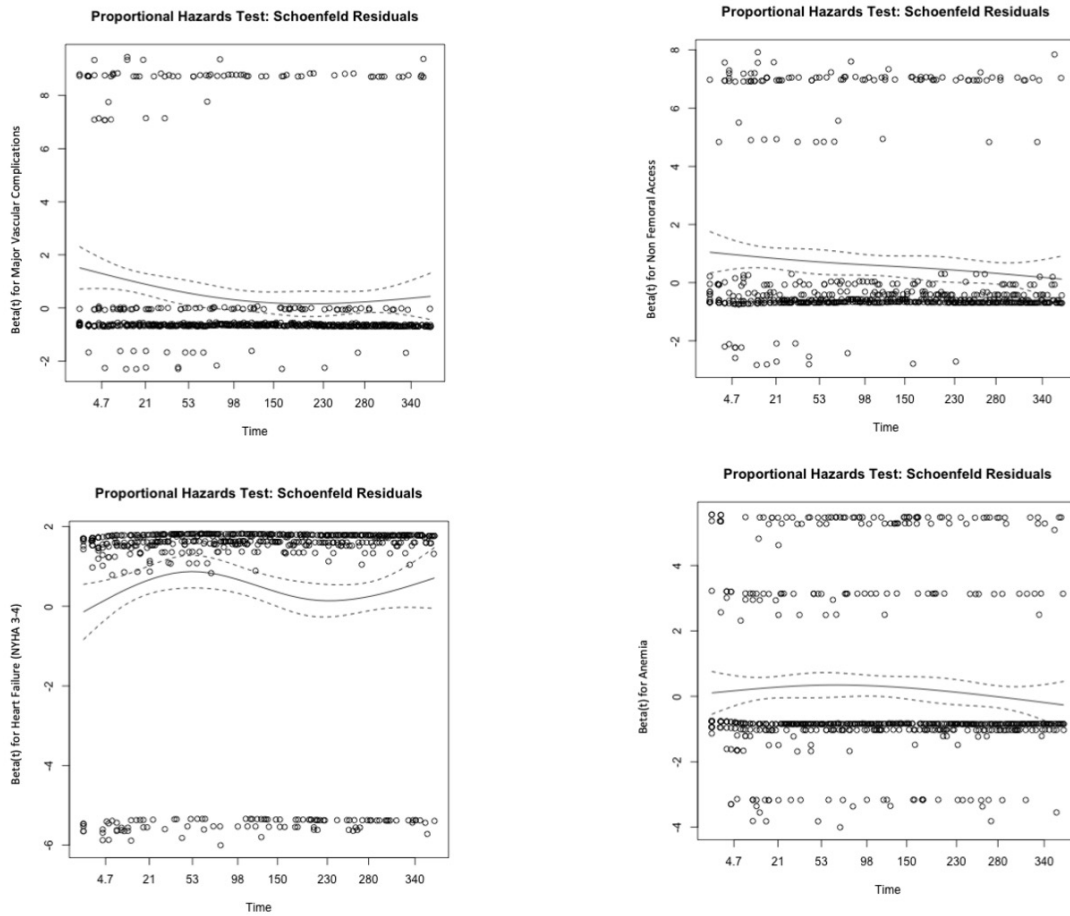

Plot of Scaled Schoenfeld Residuals (with 95% CI shown by the dotted line) vs Time, assessing assumptions of Cox regression model. There is no clear time-dependence of the parameters (Major Vascular Complications, Non femoral access, Heart Failure and Anemia).

**Figure S2. Scaled Schoenfeld Residuals and Log-minus-log (LML) survival plot for the variable Dialysis**

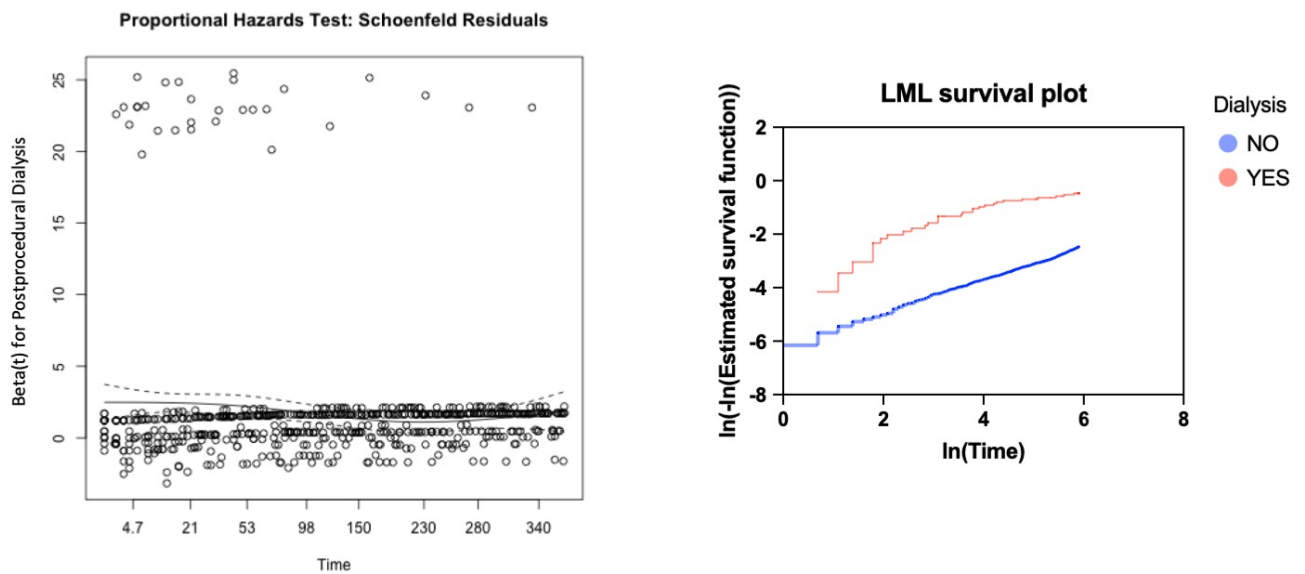

Plot of Scaled Schoenfeld Residuals (with 95% confidence intervals shown by the dotted line) vs Time, for the parameter Dialysis, again showing no time-dependence of this parameter, thus confirming assumptions of Cox proportional hazard model. A plot of log-minus-log survival is also shown on the left again confirming lack of time-dependence (the two log-minus-log survival curves are roughly parallel)



**Figure S3. DFbeta values assessing potential outliers in Cox regression model**

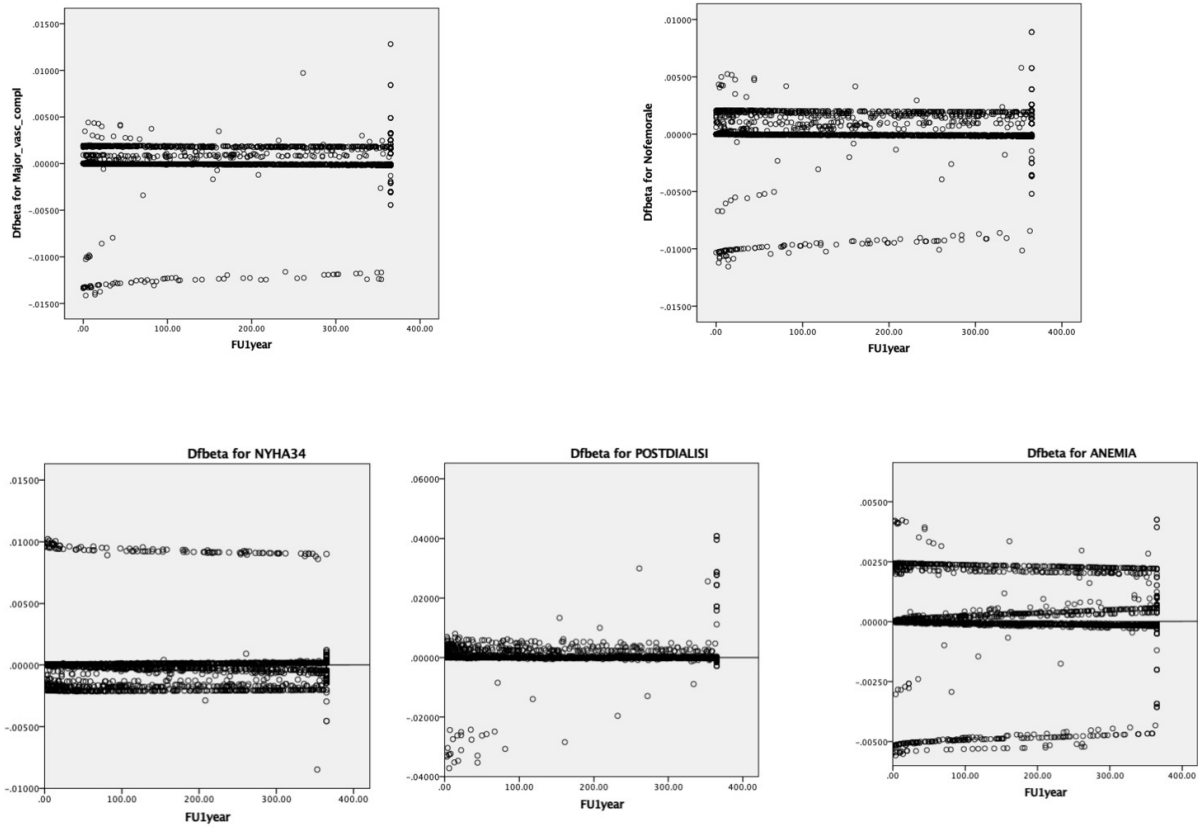

Plot of DFbeta values. In general, large values of DFBETAS indicate observations that are influential in estimating a given parameter. A cutoff of  $> \pm 0.2$  can identify possible influential values (using  $2\sqrt{n}$  as a size-adjusted cutoff value)
